# Supplementary material for: Effect of confined space reduction of graphite oxide followed by sulfur doping on oxygen reduction reaction in neutral electrolyte
Source: Royal Society of Chemistry journal article supplement (doi:10.1039/c3ta10995j), 2013-01-01
Supplement: c3ta10995j.pdf [file c3ta10995j.pdf]

## SUPPLEMENTARY INFORMATION

### **Effect of confined space reduction of graphite oxide followed by sulfur doping on oxygen reduction reaction in neutral electrolyte**

**Mykola Seredych,<sup>a</sup> Juan-Carlos Idrobo,<sup>b</sup> and Teresa J. Bandosz\*<sup>a</sup>**

*<sup>a</sup>Department of Chemistry, The CUNY Energy Institute, The City College of New York, 160 Convent Ave, New York, NY, 10031, USA. E-mail: tbandosz@ccny.cuny.edu; Fax:*

*+1 212 650 6107; Tel: +1 212 650 6017*

*<sup>b</sup>Materials Science and Technology Division, Oak Ridge National Laboratory*

*1 Bethel Valley Road, Oak Ridge, TN, 37831, USA*

## Supplementary Results:

**Table S1.** Changes in oxygen content for the experiments in 0.5 Na<sub>2</sub>SO<sub>4</sub>.

| Sample                           | O <sub>2</sub> Concentration<br>(mg L <sup>-1</sup> ) |
|----------------------------------|-------------------------------------------------------|
| RGO-O <sub>2</sub>               | before/after CV<br>7.83/9.29                          |
| RGO-N <sub>2</sub> above         | before/after CV<br>7.83/2.76                          |
| RGO-N <sub>2</sub> In and above  | before/after CV<br>2.01/3.30                          |
| RGOS-O <sub>2</sub>              | before/after CV<br>7.83/8.08                          |
| RGOS-N <sub>2</sub> above        | before/after CV<br>7.83/2.56                          |
| RGOS-N <sub>2</sub> In and above | before/after CV<br>1.92/2.40                          |

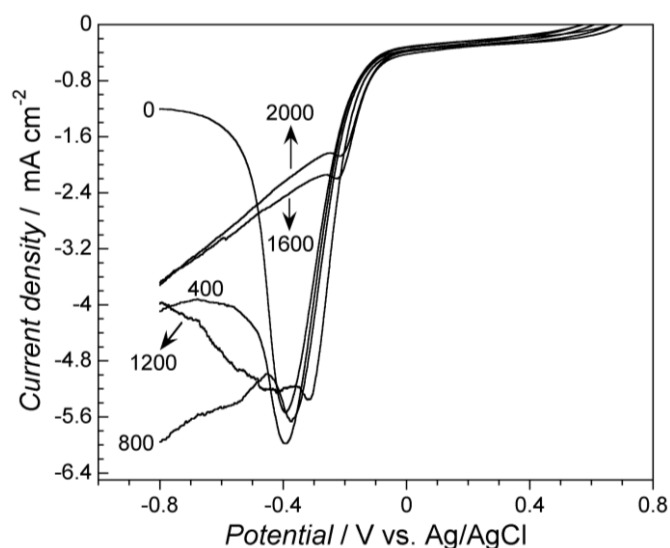

**Fig. S1.** Linear sweep voltammograms on modified glassy carbon RDE in air-saturated 0.5 M  $\text{Na}_2\text{SO}_4$  at different rotation speeds at scan rate of  $5 \text{ mV s}^{-1}$  for GO-800.

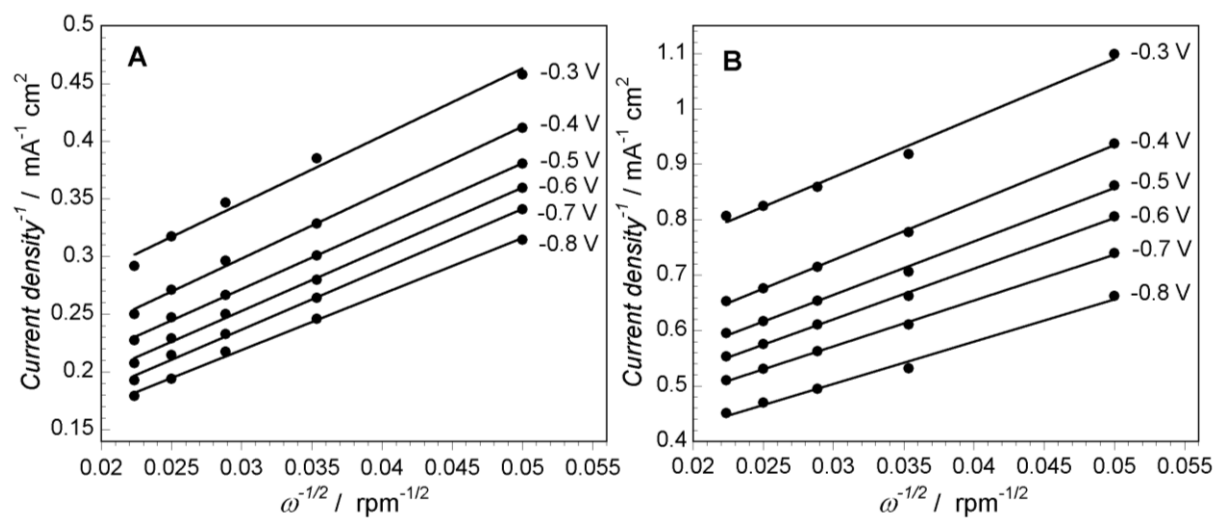

**Fig. S2.** Koutecky–Levich plots for: A) RGO and B) RGOS.

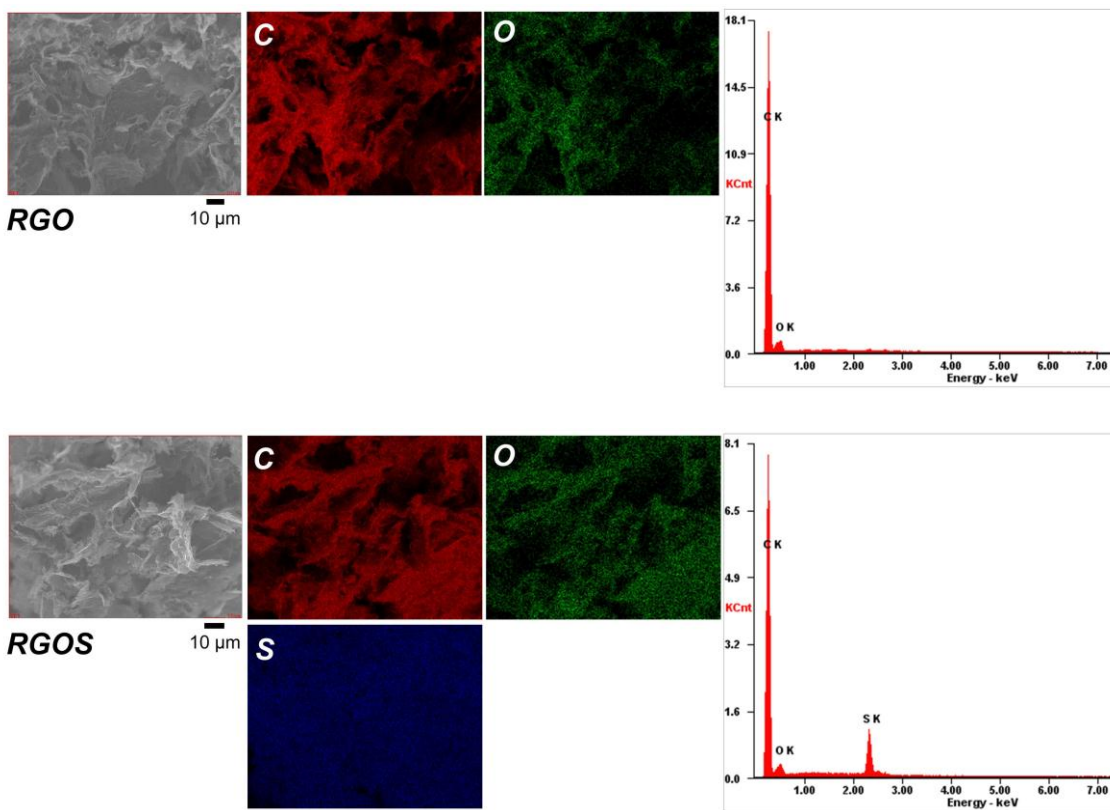

**Fig. S3.** EDX maps for RGO and RGOS.

**Table S2.** The contents of elements on the surface.

| Sample | C              | O   | S   | C              | O   | S   |
|--------|----------------|-----|-----|----------------|-----|-----|
|        | EDX (in at. %) |     |     | XPS (in at. %) |     |     |
| RGO    | 90.7           | 9.3 | --- | 91.1           | 8.7 | 0.2 |
| RGOS   | 91.3           | 5.7 | 3.0 | 94.4           | 2.8 | 2.8 |

**Table S3.** Chemical states of C, O and S atoms on RGO and RGOS with a surface concentration (in atomic %) and their binding energy (in parenthesis; [eV]).

| Sample | C-(C,S) | C-O     | C=O     | C(O)O   | O-IV                 | O-I     | O-II    | O-III   | S <sup>0</sup> /S <sub>8</sub> | R-SH    | C-S-C/<br>R-S <sub>2</sub> -OR | R <sub>2</sub> -S=O |
|--------|---------|---------|---------|---------|----------------------|---------|---------|---------|--------------------------------|---------|--------------------------------|---------------------|
|        |         |         |         |         | (O/OH <sup>-</sup> ) | (O=C)   | (-O-C)  | (O)     |                                |         |                                |                     |
| RGO    | 83.4    | 4.3     | 2.0     | 1.4     | 0.5                  | 1.2     | 6.7     | 0.3     | ---                            | 0.16    | 0.02                           | 0.02                |
|        | (284.4) | (286.6) | (287.6) | (289.0) | (530.3)              | (531.5) | (533.1) | (535.2) |                                | (163.8) | (164.4)                        | (167.2)             |
| RGOS   | 94.3    | ---     | 0.1     | ---     | 0.4                  | 0.6     | 1.6     | 0.2     | 0.18                           | 2.28    | 0.21                           | 0.13                |
|        | (284.5) |         | (287.3) |         | (530.5)              | (531.9) | (533.6) | (535.3) | (162.0)                        | (163.8) | (164.8)                        | (166.8)             |

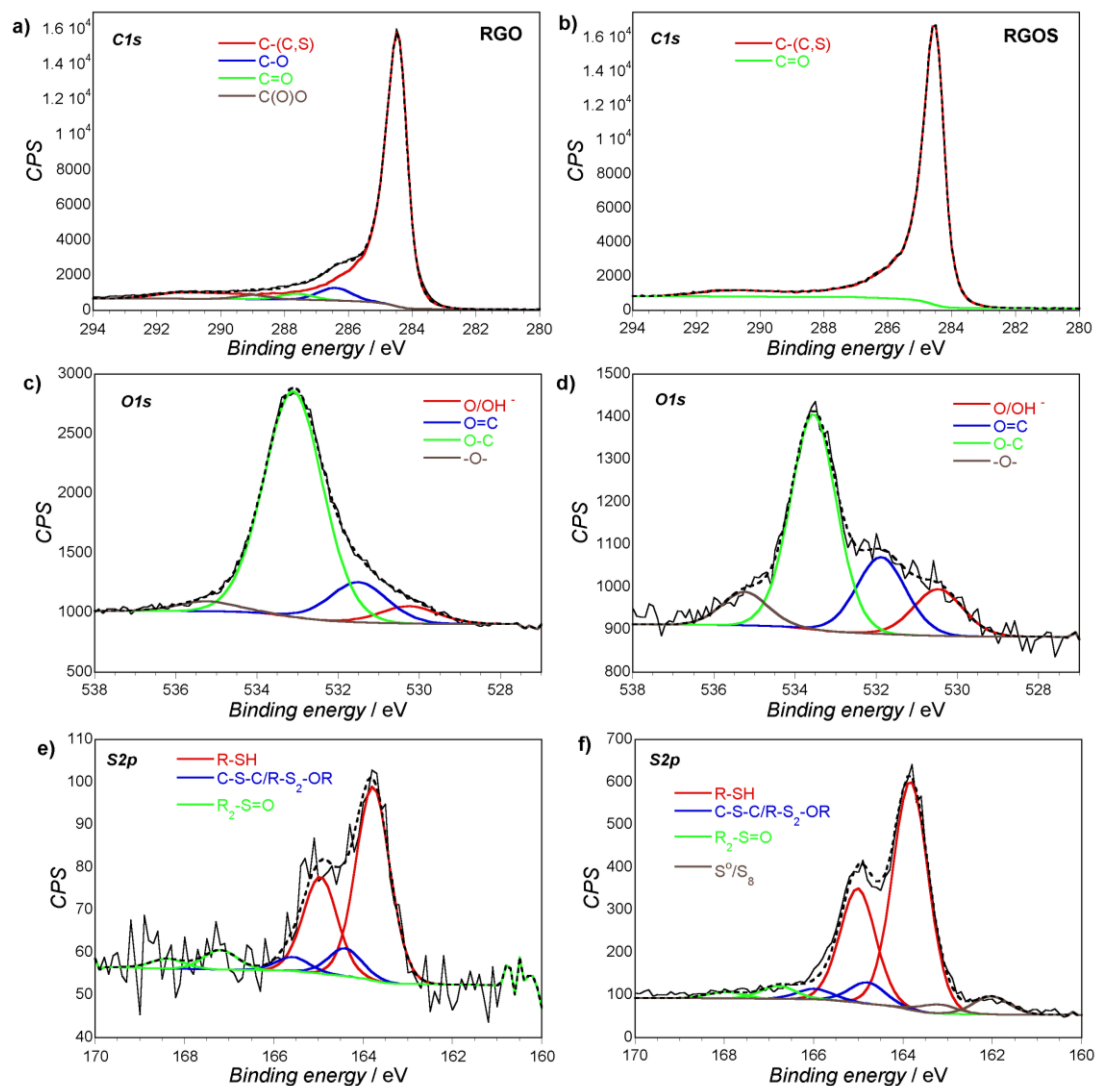

**Fig. S4.** The results of XPS spectra for C1s, O1s and S2p.

### FTIR analysis

The FTIR spectra before and after all CV cycles are presented in Fig. S7. To clearly show the changes in the chemistry of modified GO, the spectrum for the initial GO is also included.<sup>S1</sup> The bands at 1050 cm<sup>-1</sup> and 1380 cm<sup>-1</sup> represent the vibrations of C-O and O-H bonds, respectively.

The band at  $1630\text{ cm}^{-1}$  is attributed to either O-H vibration in water and/or to the presence of oxygen surface compounds such as cyclic ethers and the one at  $1735\text{ cm}^{-1}$  corresponds to the vibrations of C=O in carboxylic groups.<sup>S2,S3</sup> The band at about  $990\text{ cm}^{-1}$  represents epoxy groups.<sup>S3</sup> The vibration at  $1225\text{ cm}^{-1}$  are visible and they may be related to S=O asymmetric stretching vibration in sulfones or sulfates and/or vibration of C-O in epoxides.<sup>S1,S3</sup> In the range of higher wavenumbers three separate -OH modes can be identified with absorptions at 3610, 3420, and  $3170\text{ cm}^{-1}$ . They represent the vibration of O-H in as isolated hydroxyl groups, intercalated H<sub>2</sub>O, and -COH, respectively.

The spectra for both RGO and RGOS are rather flat owing to the black nature of carbon, high level of aromatization and small amount of functional groups. Nevertheless, after ORR in neutral electrolyte Na<sub>2</sub>SO<sub>4</sub> some changes can be distinguished in the increase in the intensity of the band at  $1500\text{ cm}^{-1}$  and  $1380\text{ cm}^{-1}$  which represent stable forms of chemisorbed oxygen and deformation vibrations of O-H groups,<sup>S4</sup> respectively. The absorption band at  $1150\text{ cm}^{-1}$  and broad band with a center at  $1020\text{ cm}^{-1}$  is attributed to C-O stretching vibrations and O-H bending modes and might be attributed to phenol, ether, lactones, carboxyl and phenolic structures. These changes indicate the oxidation of electrode surfaces.

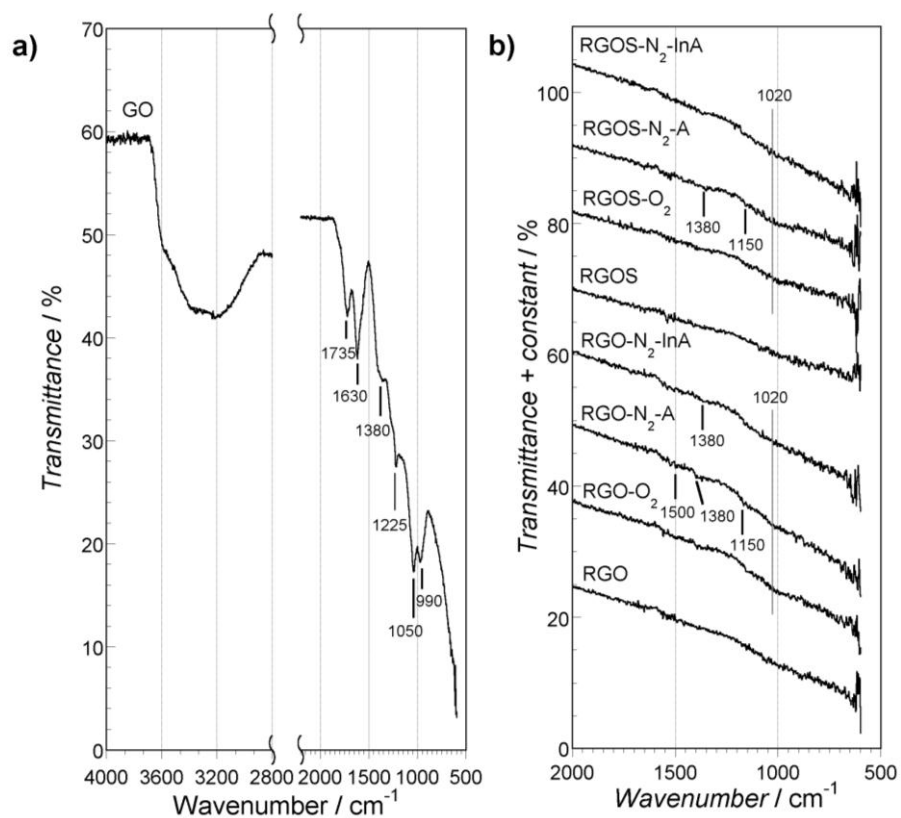

**Fig. S5.** FTIR spectra for the materials studied.

[S1] C. Petit, M. Seredych, T.J. Bandoz, *J. Mater. Chem.* **2009**, *19*, 9176.

[S2] T. Szabo, O. Berkesi, I. Dekany, *Carbon* **2005**, *43*, 3181.

[S3] C. Hontoria-Lucas, A.J. Lopez-Peinado, J. de D. Lopez-Gonzalez, M.L. Rojas-Cervantes, R.M. Martin-Aranda, *Carbon* **1995**, *33*, 1585.

[S4] J. Zawadzki, in *Chemistry and Physics of Carbon*, Vol. 21 (Ed: P.A. Thrower), Marcel Dekker, New York, USA **1989**, Ch. 2.
